# Supplementary material
Source: publisher site journal article supplement (https://www.dovepress.com/article/234291)
Supplement: Supplementary file 1 [file get_supplementary_file.php]

#### Supplementary Table 1

###### The specific primers and siRNA sequence used in this study.

| **Primer name** | **Forward** | **Reverse** |
| --- | --- | --- |
| IBP3 | TCTGATCCCAAGTTCCACCC | TCCATTTCTCTACGGCAGGG |
| Bcl-2 | ATGTGTGTGGAGAGCGTCAACC | TGAGCAGAGTCTTCAGAGACAGCC |
| BAX | GGCCCACCAGCTCTGAGCAGA | GCCACGTGGGCGGTCCCAAAGT |
| Caspase3 | CAAAGATCATACATGGAAGCG | TGAAAAGTTTGGGTTTTCCAG |
| GAPDH | CGGAGTCAACGGATTTGGTCGTAT | AGCCTTCTCCATGGTGGTGAAGAC |
| **siRNA** | **Sense** | **Anti-sense** |
| IGFBP3 | AGAGCACAGAUACCCAGAATT | UUCUGGGUAUCUGUGCUCUGA |

#### Supplementary Table 2

###### Enrichment analyses based on predicted candidate targets

| **No.** | **KEGG pathway ID** | **KEGG pathway name** | **Cluster**  **sig.** | **Adjusted**  ***p*-value** | **Targets** |
| --- | --- | --- | --- | --- | --- |
| 1 | hsa04610 | Complement and Coagulation Cascades a | 1 | 1.45E-30 | 31 |
| 2 | hsa04512 | ECM-Receptor Interaction a | 1 | 3.86E-04 | 11 |
| 3 | hsa04611 | Platelet Activation a | 1 | 1.30E-02 | 11 |
| 4 | hsa04115 | P53 Signaling Pathway a, b | 1 | 3.82E-02 | 7 |
| 5 | hsa00130 | Ubiquinone and Other Terpenoid-Quinone Biosynthesis a | 1 | 3.82E-02 | 3 |
| 6 | hsa04510 | Focal Adhesion | 0 | 1.02E-01 | 12 |
| 7 | hsa04142 | Lysosome | 0 | 1.88E-01 | 8 |
| 8 | hsa04810 | Regulation of Actin Cytoskeleton | 0 | 2.38E-01 | 11 |
| 9 | hsa04640 | Hematopoietic Cell Lineage | 0 | 2.82E-01 | 6 |
| 10 | hsa00410 | Beta-Alanine Metabolism | 0 | 4.18E-01 | 3 |
| 11 | hsa04612 | Antigen Processing and Presentation | 0 | 4.18E-01 | 5 |
| 12 | hsa04110 | Cell Cycle | 0 | 7.41E-01 | 6 |
| 13 | hsa04145 | Phagosome | 0 | 7.41E-01 | 7 |
| 14 | hsa04151 | PI3K-Akt Signaling Pathway | 0 | 7.41E-01 | 13 |
| 15 | hsa04972 | Pancreatic Secretion | 0 | 7.41E-01 | 5 |
| 16 | hsa00970 | Aminoacyl-TRNA Biosynthesis | 0 | 7.71E-01 | 3 |
| 17 | hsa03420 | Nucleotide Excision Repair | 0 | 8.08E-01 | 3 |
| 18 | hsa00020 | Citrate Cycle (TCA Cycle) | 0 | 9.39E-01 | 2 |
| 19 | hsa00052 | Galactose Metabolism | 0 | 9.39E-01 | 2 |
| 20 | hsa00330 | Arginine and Proline Metabolism | 0 | 9.39E-01 | 3 |

The 290 predicted candidate target genes (including known targets) of SAN were clustered with KEGG (adjusted P-value cutoff=0.05), a TOP 20 terms with 5 significant terms were listed including b p53/IGFBP3 signaling pathway.
